# Supplementary material
Source: publisher site journal article supplement (https://www.dovepress.com/get_supplementary_file.php?f=374736.docx)
Supplement: Supplementary file 1 [file get_supplementary_file.php]

**Supplementary Materials and Methods**

**Cell Culture**

Human embryonic kidney-derived 293T (HEK-293T) cells were purchased from the American Type Culture Collection (ATCC, Manassas, VA, USA); human non-small cell lung cancer (A549) cells, human hepatocellular carcinomas (HepG2) cells and human umbilical vein endothelial (HUVEC) cells were obtained from BeNa Culture Collection (BNCC, Beijing, China). All cells were cultured in Dulbecco’s modified essential medium (DMEM; Gibco, Carlsbad, CA, USA) with 10% fetal bovine serum (FBS; Gibco), 100 U/ml penicillin and 100 µg/ml streptomycin (Gibco), except that HUVEC cells were cultured in ECM medium (ScienCell, Carlsbad, CA, USA) containing 10% FBS and 1% endothelial cell-derived growth factor (ECGS; ScienCell).

**Cell viability assays**

Cytotoxicity of pHDL-Cur or pHDL-TanIIA was examined with cultured cells seeded in 96-well plates and determined by MTS assay (CellTiter 96 AQueous One Solution from Promega, Madison, WI, USA). Cytotoxicity of pHDL-Cur or pHDL-TanIIA (0-100 µM) was determined after pHDL-Cur or pHDL-TanIIA exposure for 48 hours.

**Biodistribution of TanIIA**

The quantification of TanIIA in tissues was detected by HPLC. Biodistribution of TanIIA was performed by using 6-month-old male ApoE-/- mice challenged with either TanIIA suspended in 0.5% carboxymethyl cellulose at a dose of 333.3 mg/kg by gavage or pHDL-TanIIA (56.7 mg/kg TanIIA) through *ip*, with saline administered by *ip* as the control. Tissue distribution of TanIIA was determined at 0.5 h post pHDL-TanIIA treatment by *ip* injection or free TanIIA by gavage. Briefly, 500 µL saline was added to 100 mg tissues, followed by homogenization at 70 Hz for 120 s and centrifugation at 13000 rpm, 4℃ for 10 min. The supernatant was collected and extracted with a five-fold volume of ethyl acetate. The ethyl acetate extract was evaporated to dryness in vacuo, and the residue dissolved in acetonitrile. In chromatography, Agilent Zorbax SB-C18 column was used as the stationary phase (4.6 mm × 250 mm, 5 μm), and the mobile phase was methanol and 0.2% acetic acid (82:18, v/v) at a flow rate of 1 mL/min with the retention time being 13 min. The amounts of TanIIA were quantified at 275 nm.

***Ex vivo* targeting of pHDL**

C57BL/6J and *ApoE-/-*mice of established AS plaque were subjected to *ip* of 40 mg/kg FITC-pHDL synthesized by Genscript Inc. Forty minutes after injection, mice were isoflurane euthanized and kept on a warm patch, then the hair of the imaging regions was carefully removed. To obtain signals of high purity and sustainability, we captured traces of FITC-pHDL from both the whole animal and the dissected heart and aorta using the IVIS Imaging System.

**Supplementary Figures**


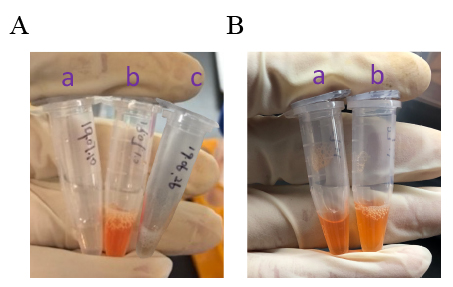


**Figure S1. Optimization of synthetic parameters of pHDL-TanIIA.** (A), purified pHDL-TanIIA synthesized using microfluidics under selected flow rate in external-middle-external channels of 2.5-1-2.5 ml/min (a), 10-1-10 ml/min (b), and 5-1-5 ml/min (c), respectively. (B), purified pHDL-TanIIA synthesized using microfluidics with 0.1 mg/ml peptide (a) or 0.2 mg/ml peptide (b).


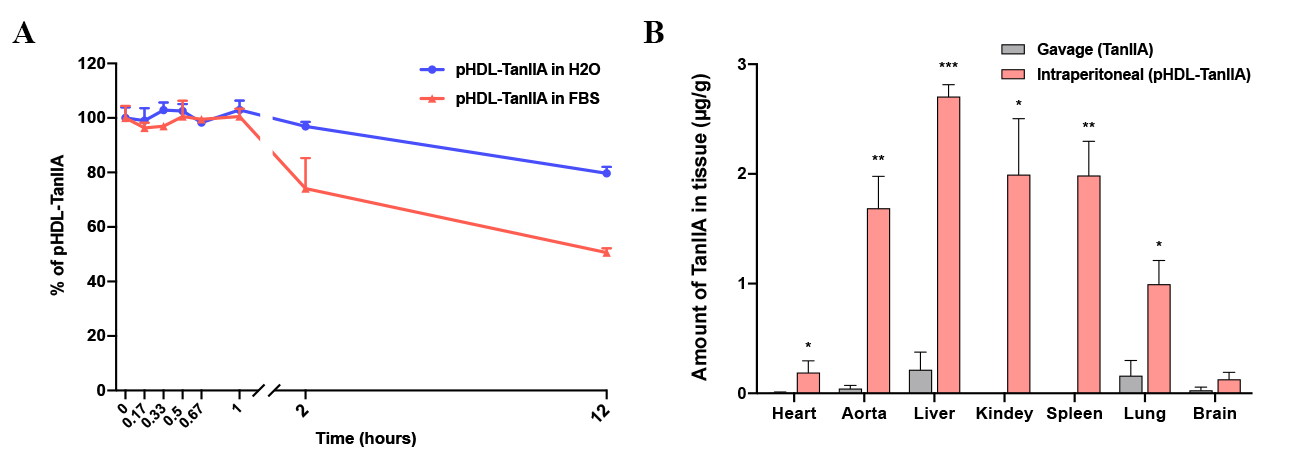


**Figure S2. Stability of pHDL-TanIIA and distribution of pHDL-TanIIA/TanIIA in tissues of *ApoE* deficient mice.** (A), stability of pHDL-TanIIA in the condition of H2O or FBS at 37°C measured at T=0, 0.17, 0.33, 0.5, 0.67, 1, 2, and 12 h of incubation time using HPLC. (B), tissue distribution of TanIIA by HPLC was determined at T = 0.5 h post pHDL-TanIIA treatment by *ip* injection or free TanIIA by gavage. Data are average of at least 3 animals and expressed as mean±SEM. *, *P*<0.05; **, *P*<0.01; and ***, *P*<0.005 *vs* corresponding TanIIA by gavage.


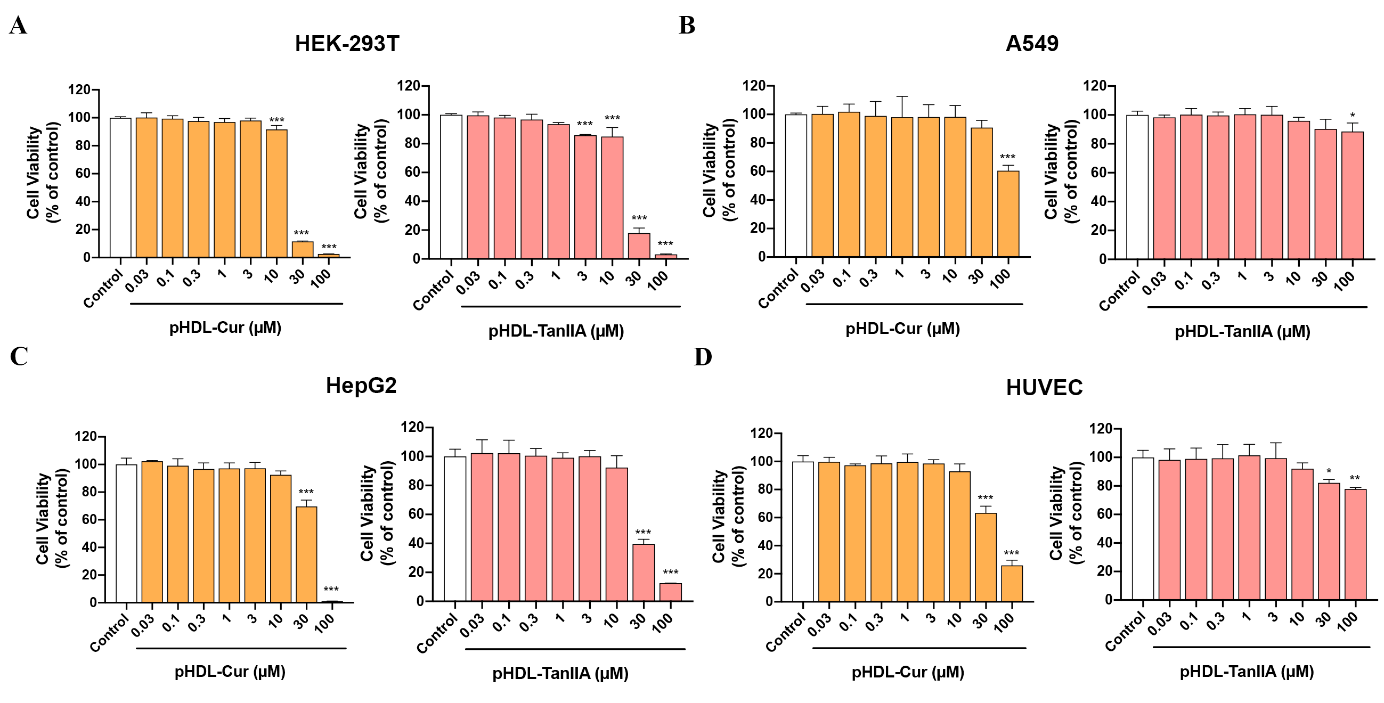


**Figure S3. Cell viabilities in response to pHDL-Cur or pHDL-TanIIA.** Cell viability was measured in HEK-293T (A), A549 (B), HepG2 (C) and HUVEC (D) cell lines after 48 h exposure to pHDL-Cur or pHDL-TanIIA at indicated concentrations. Data were averaged of at least 3 independent experiments and calculated as % of corresponding non-treated control cells.

**Figure S4. Plaque-targeting of pHDL.** Fluorescence imaging of C57BL/6J and ApoE-/- mice in situ (A) or with excised heart and aorta (B) after iv injection FITC-pHDL. Indicators of fluorescence intensity are shown on the right.
